# Supplementary material for: Promoted photo-Fenton reactivity through electron transfer between non-contacted Au nanoparticles and Fe2O3 nanowires in a confined space
Source: Royal Society of Chemistry journal article supplement (doi:10.1039/d3en00024a), 2023-01-01
Supplement: d3en00024a1.pdf [file d3en00024a1.pdf]

## Supporting Information

Promoted photo-Fenton reactivity through electron transfer  
between non-contacted Au nanoparticle and Fe<sub>2</sub>O<sub>3</sub> nanowire in  
confined space

Shuang Jin, Yi-Fei Zhang, Xin-Jie Du, Qiang Huang, and Zhe Chen\*

MOE Key Laboratory of Resources and Environmental System Optimization, College of  
Environmental Science and Engineering, North China Electric Power University, Beijing 102206,  
P. R. China

## Table of Contents

|                                                                                                                                                                                          |    |
|------------------------------------------------------------------------------------------------------------------------------------------------------------------------------------------|----|
| Figure S1. Full-scale XPS spectra of $\text{Fe}_2\text{O}_3\text{-Au@SiO}_2$ . ....                                                                                                      | 3  |
| Figure S2. Recyclability tests of $\text{Fe}_2\text{O}_3\text{-Au@SiO}_2$ . ....                                                                                                         | 4  |
| Figure S3. HRTEM images of $\text{Fe}_2\text{O}_3\text{-Au@SiO}_2$ and size histogram of the cavity (a, b) before reaction. (c, d) after reaction. ....                                  | 5  |
| Figure S4. The XRD pattern of $\text{Fe}_2\text{O}_3$ , $\text{Fe}_2\text{O}_3\text{-SiO}_2$ , $\text{Au-SiO}_2$ and $\text{Fe}_2\text{O}_3\text{-Au@SiO}_2\text{-no-cavity}$ . ....     | 6  |
| Figure S5. (a-c) The TEM images of $\text{Fe}_2\text{O}_3\text{-Au@SiO}_2\text{-no-cavity}$ , $\text{Fe}_2\text{O}_3\text{-SiO}_2$ , and $\text{Au-SiO}_2$ . ....                        | 7  |
| Figure S6. The TEM images of $\text{Fe}_2\text{O}_3\text{-Au@SiO}_2$ catalysts with different cavity sizes (a-d) 5 nm, 10 nm, 15 nm, 30 nm.....                                          | 8  |
| Figure S7. The contaminants removal from domestic sewage treatment by $\text{Fe}_2\text{O}_3\text{-Au@SiO}_2$ .....                                                                      | 9  |
| Text S1 The preparation process of $\text{Fe}_2\text{O}_3$ , $\text{Fe}_2\text{O}_3\text{-SiO}_2$ , $\text{Au-SiO}_2$ and $\text{Fe}_2\text{O}_3\text{-Au@SiO}_2\text{-no-cavity}$ ..... | 10 |
| Table S1. Chemical formulas and detailed information for HPLC analysis.....                                                                                                              | 11 |
| Table S2. The concentration of $\cdot\text{O}^{2-}$ in the heterogeneous photo-Fenton reaction with different catalysts. ....                                                            | 12 |

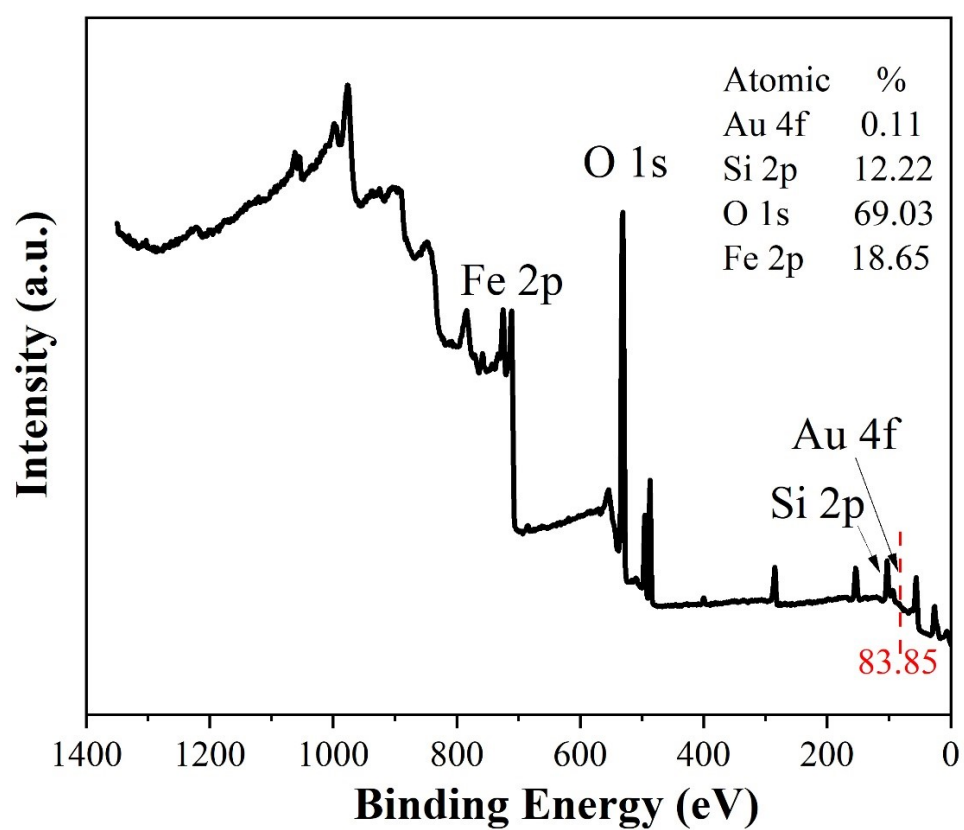

Figure S1. Full-scale XPS spectra of  $\text{Fe}_2\text{O}_3\text{-Au@SiO}_2$ .

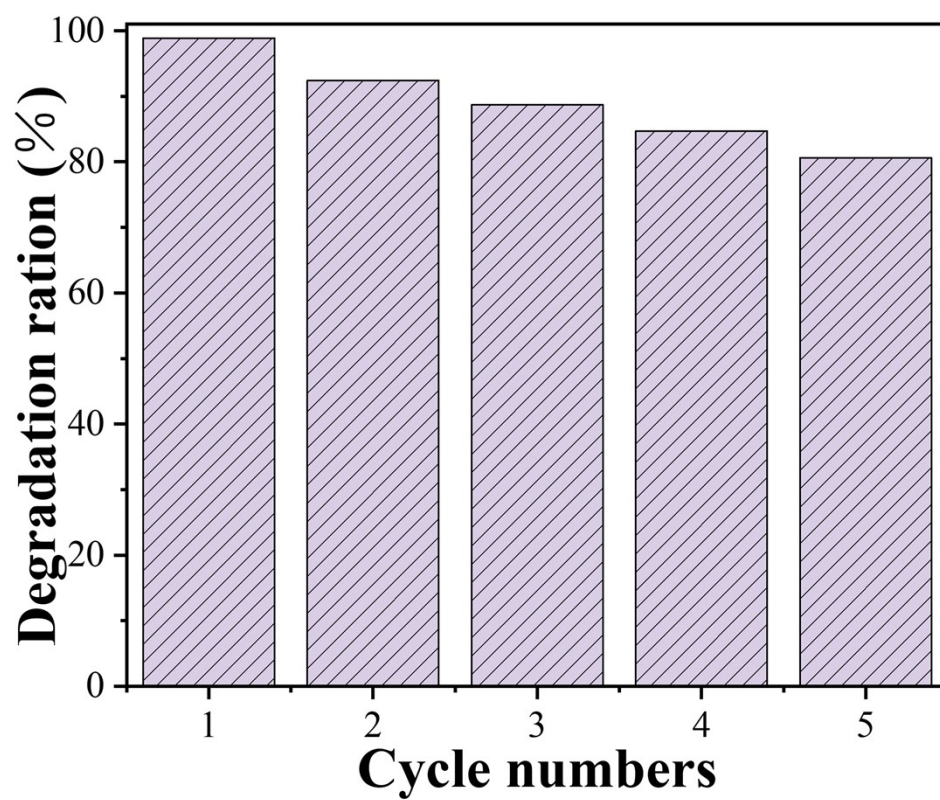

Figure S2. Recyclability tests of  $\text{Fe}_2\text{O}_3\text{-Au@SiO}_2$ .

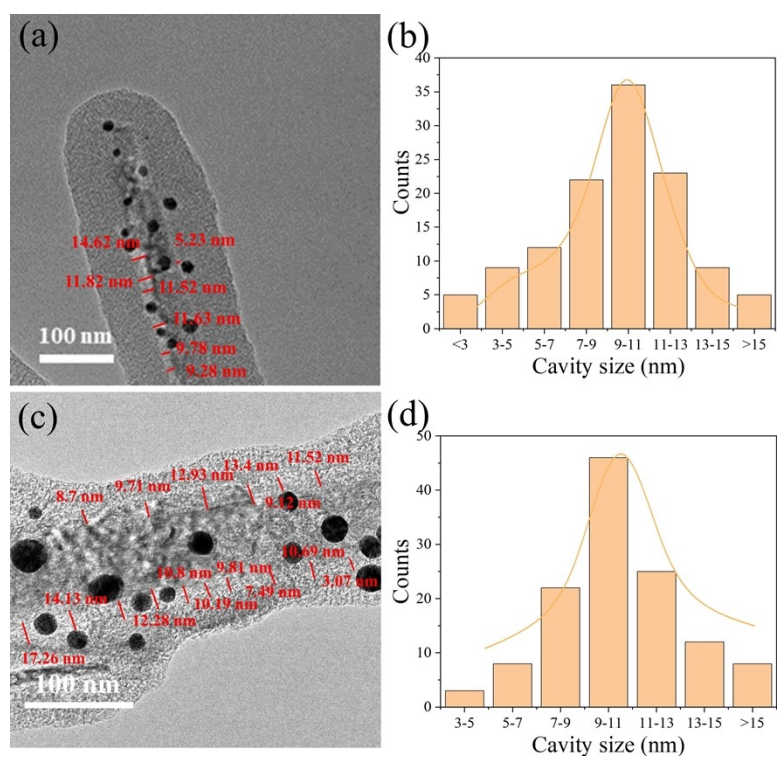

Figure S3. HRTEM images of  $\text{Fe}_2\text{O}_3\text{-Au@SiO}_2$  and size histogram of the cavity (a, b) before reaction. (c, d) after reaction.

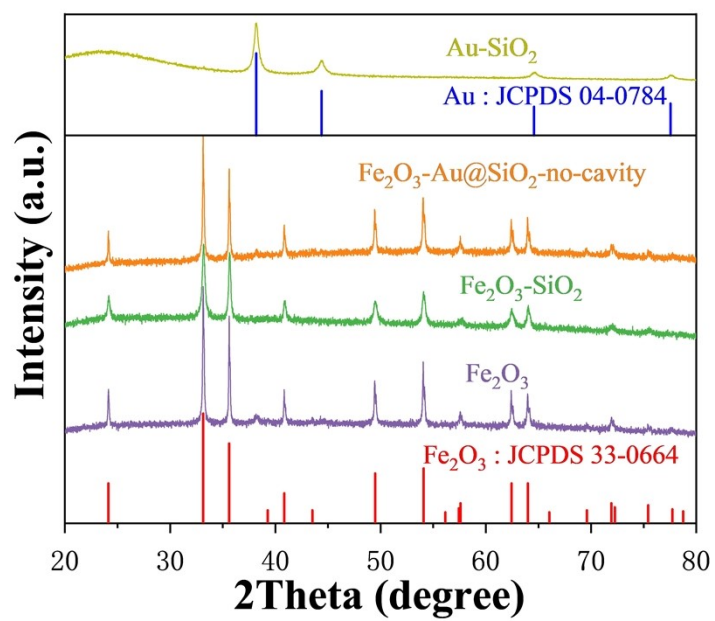

Figure S4. The XRD pattern of Fe<sub>2</sub>O<sub>3</sub>, Fe<sub>2</sub>O<sub>3</sub>-SiO<sub>2</sub>, Au-SiO<sub>2</sub> and Fe<sub>2</sub>O<sub>3</sub>-Au@SiO<sub>2</sub>-no-cavity.

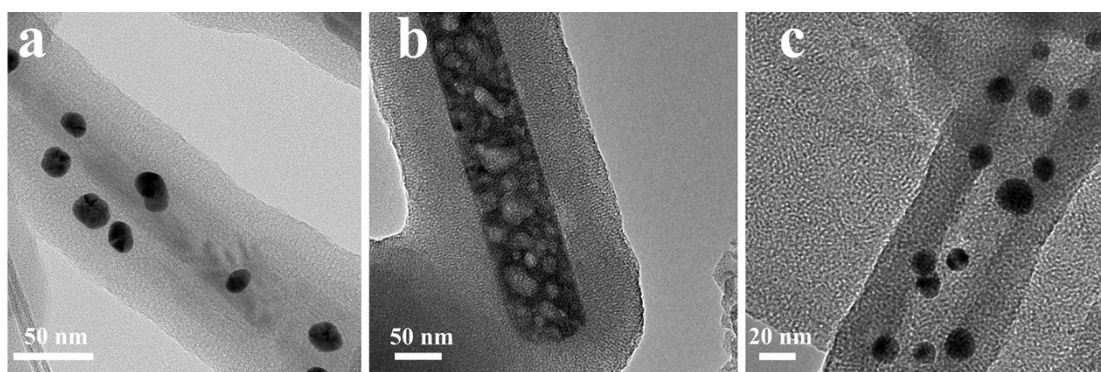

Figure S5. (a-c) The TEM images of  $\text{Fe}_2\text{O}_3\text{-Au@SiO}_2\text{.no-cavity}$ ,  $\text{Fe}_2\text{O}_3\text{-SiO}_2$  and  $\text{Au-SiO}_2$ .

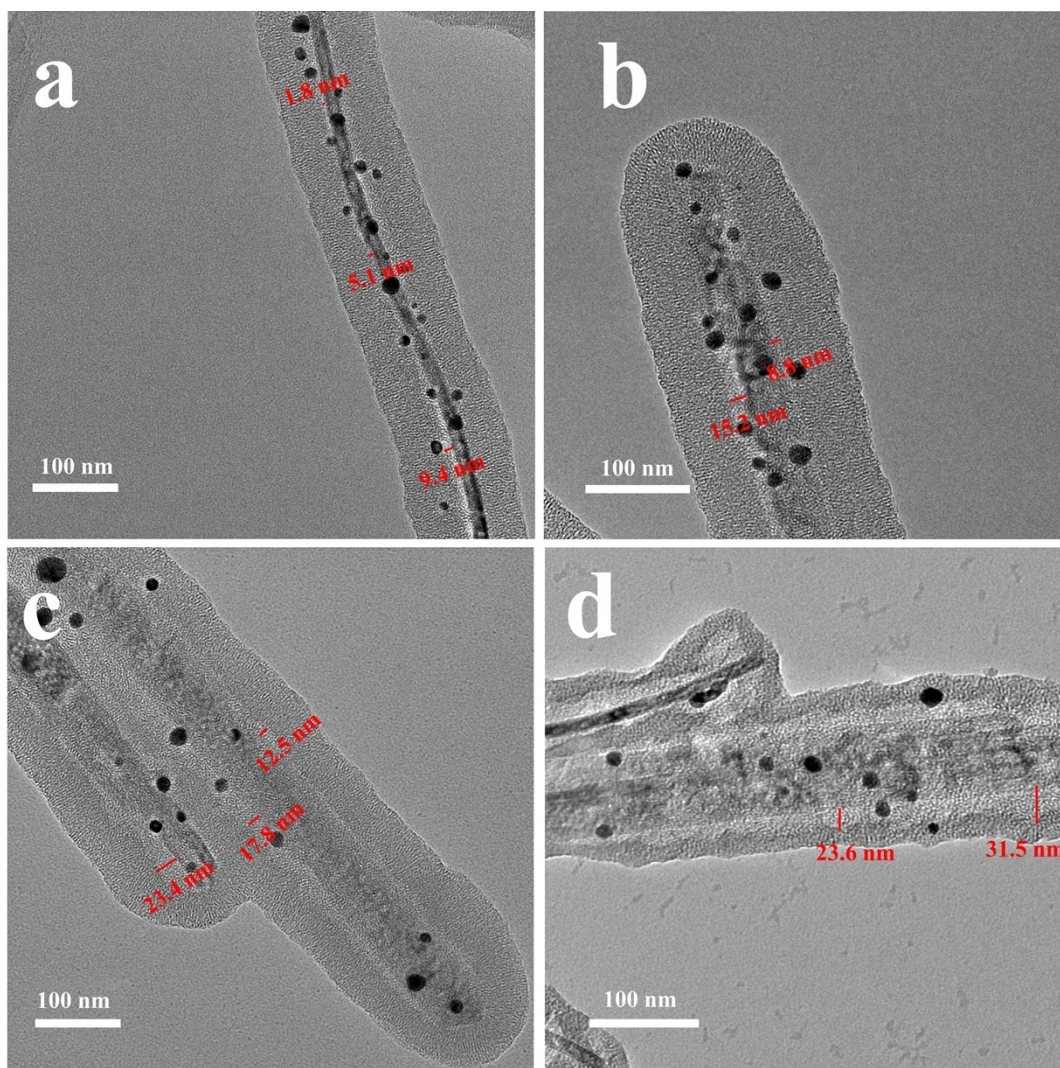

Figure S6. The TEM images of  $\text{Fe}_2\text{O}_3\text{-Au@SiO}_2$  catalysts with different cavity sizes (a-d) 5 nm, 10 nm, 15 nm, 30 nm.

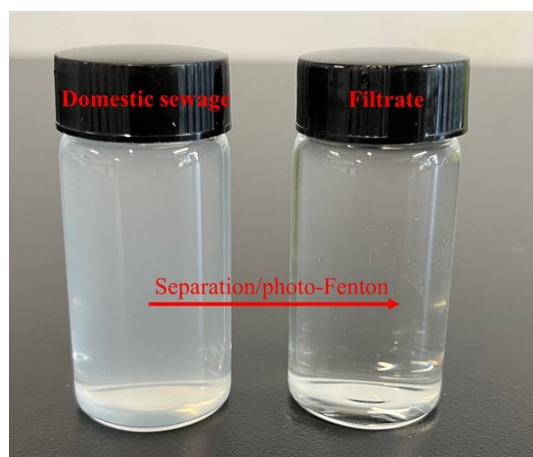

Figure S7. The contaminants removal from domestic sewage treatment by  $\text{Fe}_2\text{O}_3$ - $\text{Au@SiO}_2$ .

Text S1 The preparation process of  $\text{Fe}_2\text{O}_3$ ,  $\text{Fe}_2\text{O}_3\text{-SiO}_2$ ,  $\text{Au-SiO}_2$  and  $\text{Fe}_2\text{O}_3\text{-Au@SiO}_2\text{-no-cavity}$ .

$\text{Fe}_2\text{O}_3\text{-SiO}_2$ : Typically, the  $\text{Fe}_2\text{O}_3\text{@PDA}$  composite was dispersed in the mix solution composed of 60 mL of ethanol, 0.28 g CTAB, 14 mL ammonia (25 wt.%) and 80 ml water. Then 250  $\mu\text{L}$  of TEOs was added to with vigorously stirring for 6 hours. The precipitates were collected by centrifugation and washed with water and ethanol, and dried in oven at  $80^\circ\text{C}$  for 6 hours to obtain  $\text{Fe}_2\text{O}_3\text{@PDA @SiO}_2$  composite. After calcinated in a muff furnace at  $400^\circ\text{C}$  for 4 hours, the final catalyst was prepared and denoted as  $\text{Fe}_2\text{O}_3\text{-SiO}_2$ .

$\text{Au-SiO}_2$ : The 200 mg  $\text{Fe}_2\text{O}_3\text{-Au@SiO}_2$  was put into 20mL 2mol/L HCl solution and stirred for 24h to corrode the  $\text{Fe}_2\text{O}_3$  wires. The precipitates were collected by centrifugation and washed with ultrapure water, and dried in oven at  $80^\circ\text{C}$  for 6 hours to obtain  $\text{Au-SiO}_2$  composite.

$\text{Fe}_2\text{O}_3\text{-Au@SiO}_2\text{-no-cavity}$ : The synthesis method of  $\text{Fe}_2\text{O}_3\text{-Au@SiO}_2\text{-no-cavity}$  was similar with  $\text{Fe}_2\text{O}_3\text{-Au@SiO}_2$  except that the step of dopamine polymerization was omitted.

Table S1. Chemical formulas and detailed information for HPLC analysis.

| Compounds             | Formula                                                         | Mobile phase (%) |                                     |          |              | Wavelength |
|-----------------------|-----------------------------------------------------------------|------------------|-------------------------------------|----------|--------------|------------|
|                       |                                                                 | Milli-Q<br>water | Milli-Q<br>water<br>(0.1%<br>HCOOH) | Methanol | Acetonitrile |            |
| Bisphenol A           | C <sub>15</sub> H <sub>16</sub> O <sub>2</sub>                  | 30               |                                     | 70       |              | 225        |
| 2-chlorophenol        | ClC <sub>6</sub> H <sub>4</sub> OH                              | 40               |                                     | 60       |              | 275        |
| 4-chlorophenol        | C <sub>6</sub> H <sub>5</sub> OCl                               | 30               |                                     | 70       |              | 280        |
| 2,4-dichlorophenol    | C <sub>6</sub> H <sub>4</sub> Cl <sub>2</sub> O                 | 30               |                                     | 70       |              | 220        |
| 2,4,6-trichlorophenol | C <sub>6</sub> H <sub>3</sub> Cl <sub>3</sub> O                 | 30               |                                     | 70       |              | 290        |
| Ciprofloxacin         | C <sub>17</sub> H <sub>18</sub> FN <sub>3</sub> O <sub>3</sub>  |                  | 80                                  |          | 20           | 278        |
| Atrazine              | C <sub>8</sub> H <sub>14</sub> C <sub>1</sub> N <sub>5</sub>    | 30               |                                     | 70       |              | 220        |
| Carbamazepine         | C <sub>15</sub> H <sub>12</sub> N <sub>2</sub> O                | 40               |                                     | 60       |              | 210        |
| Sulfamethoxazole      | C <sub>10</sub> H <sub>11</sub> N <sub>3</sub> O <sub>3</sub> S |                  | 55                                  |          | 45           | 265        |
| hydroxybenzoic acid   | C <sub>7</sub> H <sub>6</sub> O <sub>3</sub>                    |                  | 65                                  |          | 35           | 255        |

Table S2. The concentration of  $\cdot\text{O}^{2-}$  in the heterogeneous photo-Fenton reaction with different catalysts.

| Materials                                                | Concentration (spins/ml) |
|----------------------------------------------------------|--------------------------|
| $\text{Fe}_2\text{O}_3\text{-Au@SiO}_2$                  | $1.827 \times 10^7$      |
| $\text{Fe}_2\text{O}_3\text{-Au@SiO}_2\text{-no cavity}$ | $1.200 \times 10^7$      |
| $\text{Fe}_2\text{O}_3\text{-SiO}_2$                     | $6.269 \times 10^6$      |
| $\text{Au-SiO}_2$                                        | $5.293 \times 10^6$      |
| Blank                                                    | /                        |
